# Supplementary material for: Deciphering developmental dysgraphia: evidence of a verbal advantage
Source: Research Square preprint supplement (doi:10.21203/rs.3.rs-6938106/v1), 2025-07-28
Supplement: Supplementary file 2 [file 618a52a996c9aaefc412f5bb.docx]

# Supplementary materials 4


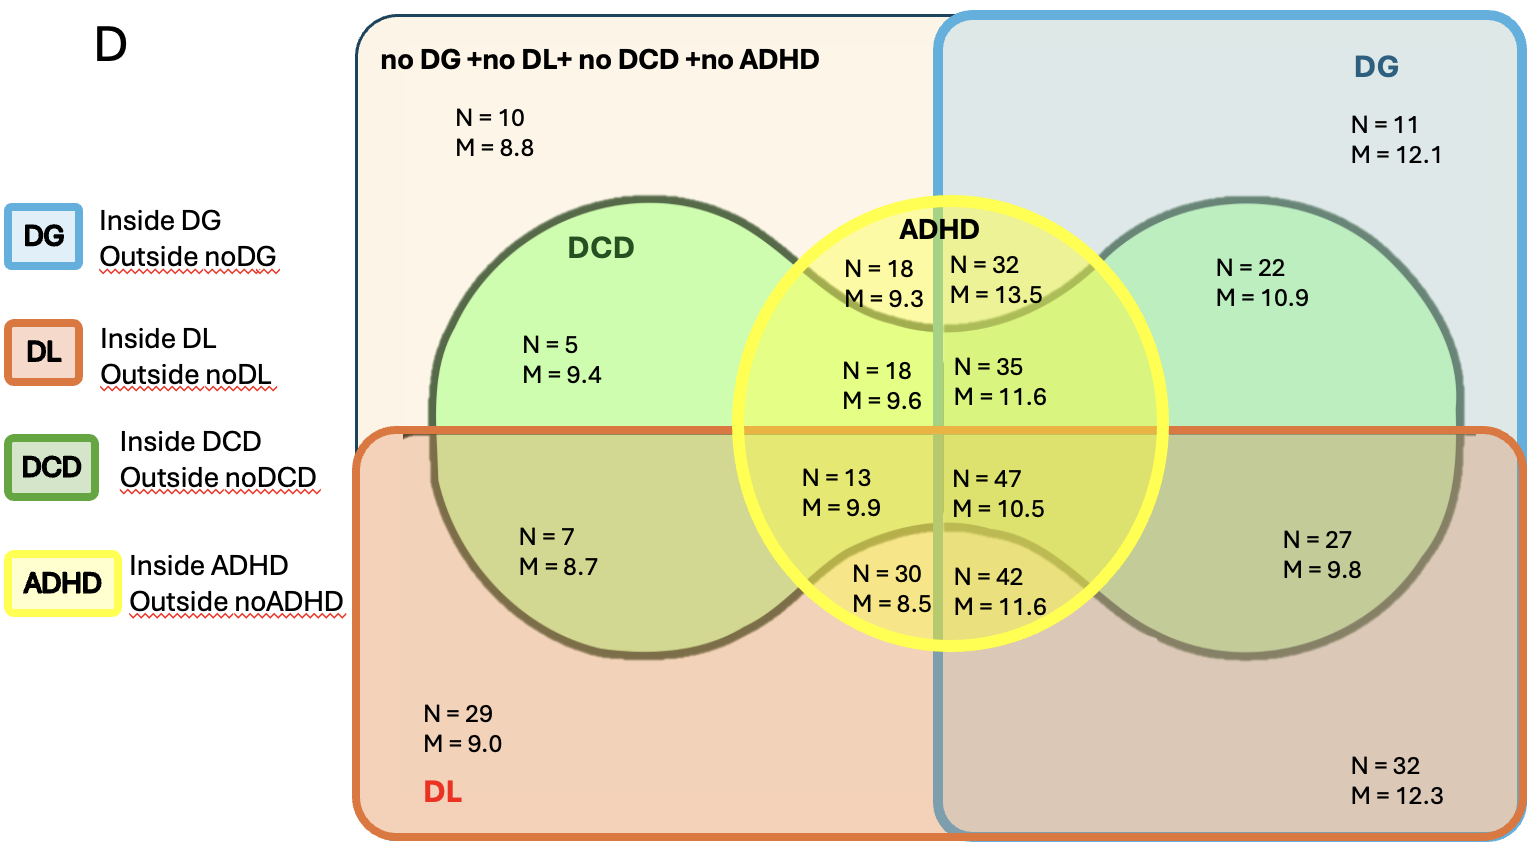


Figure 4-1: sample distribution according to diagnoses M=mean on SIM subtest; N= subgroup size. The vertical blue separation (left/right) represents the DG/noDG distribution. The horizontal orange separation (bottom/top) corresponds to the DL/noDL distribution. The circular yellow separation (inside/outside) indicates the ADHD/noADHD distribution. The ovoid green separation (inside/outside) reflects the DCD/noDCD distribution.
