# Supplementary material for: Deciphering developmental dysgraphia: evidence of a verbal advantage
Source: Research Square preprint supplement (doi:10.21203/rs.3.rs-6938106/v1), 2025-07-28
Supplement: Supplementary file 3 [file bd772705e4a22875ca28b8c1.docx]

DESCRIPTIONS OF THE WISC -V SUBTESTS

- **The "Similarities" (SIM) subtest** assesses the children’s conceptualization and categorization abilities in an oral modality. This test does not directly correlate with the children’s linguistic level, as it focuses only on the conceptualization level (sensory, functional, or decontextualized) of responses, without considering the syntax or grammar.
- **The "Vocabulary" (VOC) subtest** evaluates implicit vocabulary learning abilities. This task is sensitive to the socio-cultural environment in which the individual grows, as it depends on the richness of verbal interactions the child is exposed to (Grégoire, 2021). According to Wechsler, it reflects the child’s ability to acquire knowledge, often referred to as crystallized intelligence.

SIM and VOC contribute to the calculation of the Verbal Comprehension Index (VCI).

- **The "Block Design" (BD) subtest** assesses visual-spatial processing abilities, both perceptual and constructive, as it requires the manipulation of 3D cubes to reproduce a 2D pattern.
- **The "Visual Puzzles" (PUZ) subtest** requires the mental decomposition of a presented geometrical figure to identify its elementary parts.

BD and PUZ contribute to the calculation of the Visual-Spatial Index (VSI).

- **The "Matrix Reasoning" (MAT) subtest** assesses the ability to determine a rule and apply it. This subtest also involves visual-spatial skills and working memory.
- **The "Figure Weights" (FW) subtest** involves inductive and deductive reasoning based on numerical patterns.

MAT and FW contribute to the calculation of the Fluid Reasoning Index (FRI).

- **The "Digit Span" (DS) and "Picture Span" (PS) subtests** are based on Baddeley’s model of working memory. They assess the capacity to store information in the phonological loop and manipulate it through the central executive component of working memory.

DS and PS contribute to the calculation of the Working Memory Index (WMI).

- **The "Coding" (COD) subtest** measures learning abilities, particularly in terms of speed and quality. The child is asked to copy complex symbols onto paper. Graphomotor skills influence performance on this subtest.
- **The "Symbols" (SYM) subtest** evaluates the ability to quickly identify similarities and differences between visual stimuli. This test challenges visual-attentional capacities.

COD and SYM contribute to the calculation of the Processing Speed Index (PSI).
